# Supplementary material
Source: Research Square preprint supplement (doi:10.21203/rs.3.rs-9379486/v1)

Appendix 1 – Hotspot-Coldspot maps for mixed spruce forests, mixed forest, deciduous forests and hardwood forests.


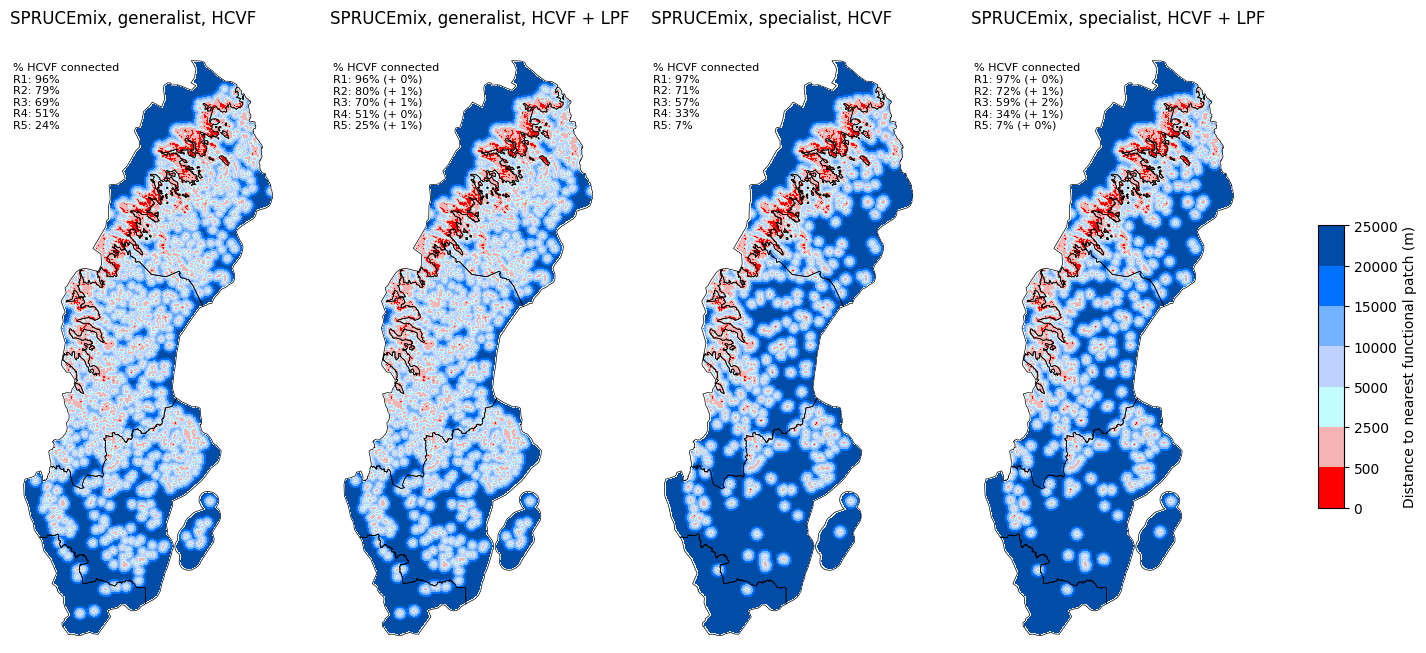


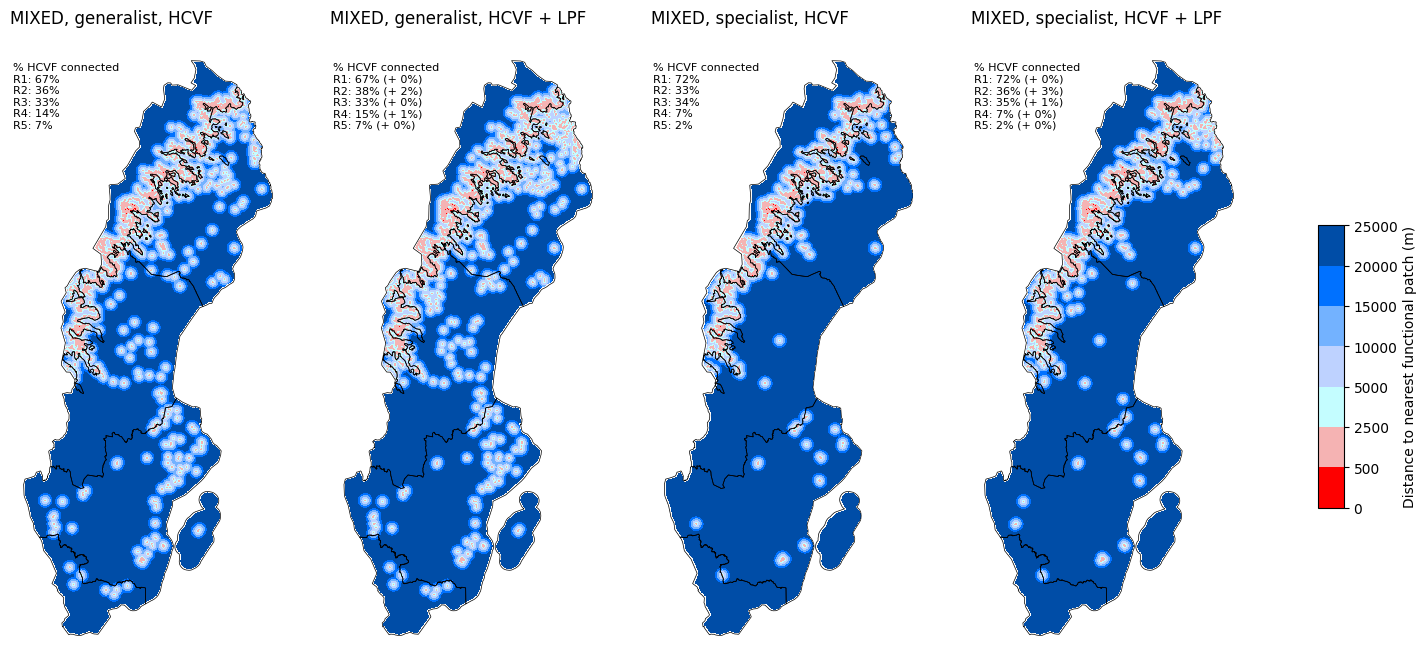


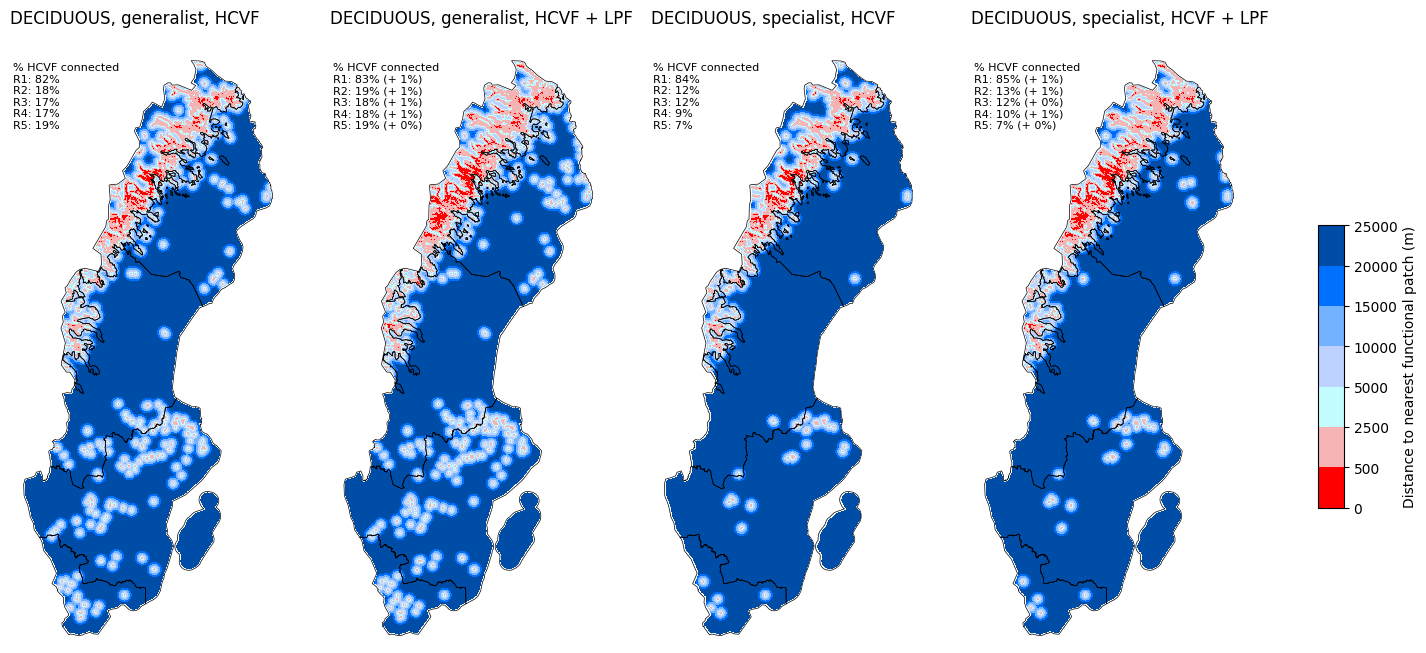


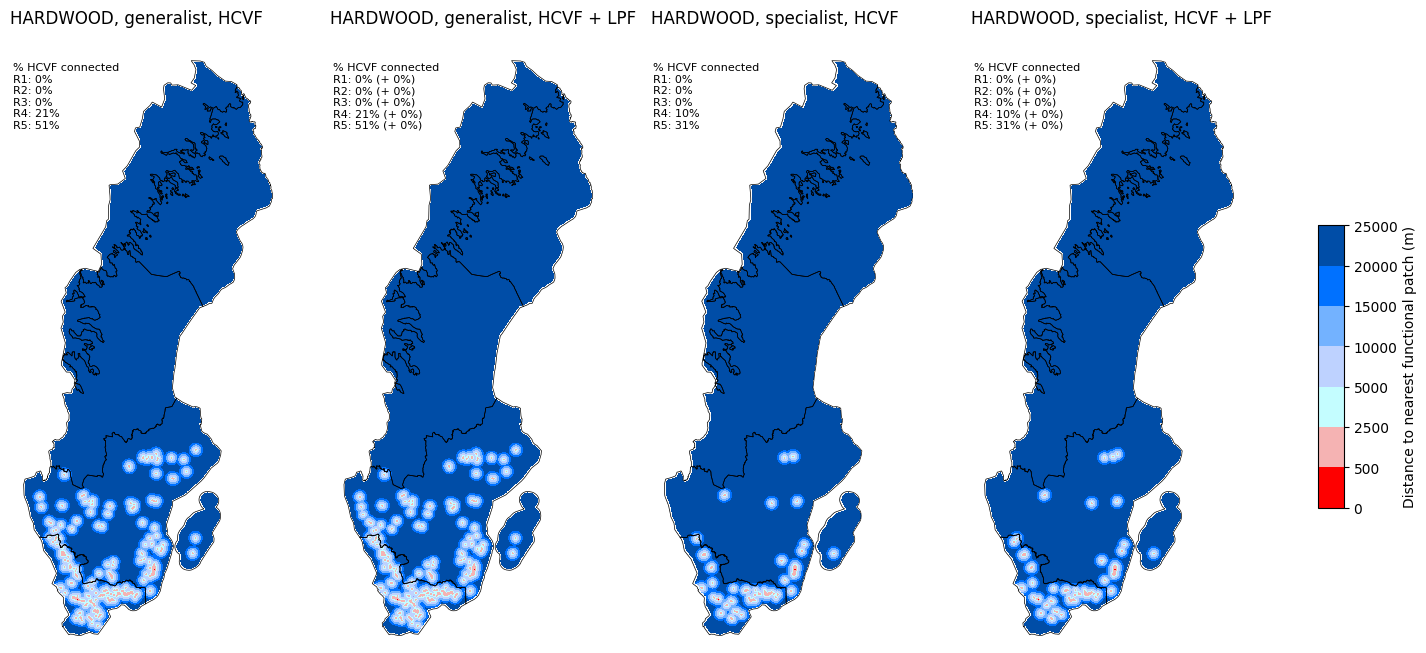

Supplement: Supplementary file 1 [file cc63a6c1bebd8e0162215d55.docx]
